# Supplementary material for: Hyperbaric oxygen for patients with chronic bowel dysfunction after pelvic radiotherapy (HOT2): a randomised, double-blind, sham-controlled phase 3 trial
Source: PubMed Central journal article supplement (PMC4737893; doi:10.1016/s1470-2045(15)00461-1), 2016-02

# THE LANCET **Oncology**

## **Supplementary appendix**

This appendix formed part of the original submission and has been peer reviewed.  
We post it as supplied by the authors.

Supplement to: Glover M, Smerdon GR, Andreyev HJ, et al. Hyperbaric oxygen for patients with chronic bowel dysfunction after pelvic radiotherapy (HOT2): a randomised, double-blind, sham-controlled phase 3 trial. *Lancet Oncol* 2015; published online Dec 15. [http://dx.doi.org/10.1016/S1470-2045\(15\)00461-1](http://dx.doi.org/10.1016/S1470-2045(15)00461-1).

## Supplementary Tables and Figures to be added to the internet

**Table S1: IBDQ raw scores at baseline and 12 months**

|                  | Control                        |    | HBO     |    | Total   |    |         |
|------------------|--------------------------------|----|---------|----|---------|----|---------|
|                  | N                              | %  | N       | %  | N       | %  |         |
| <b>Baseline</b>  | More than ever before          | 3  | 10.70%  | 8  | 14.50%  | 11 | 13.30%  |
|                  | Extremely frequently           | 3  | 10.70%  | 6  | 10.90%  | 9  | 10.80%  |
|                  | Very frequently                | 4  | 14.30%  | 8  | 14.50%  | 12 | 14.50%  |
|                  | Moderate increase in frequency | 3  | 10.70%  | 6  | 10.90%  | 9  | 10.80%  |
|                  | Some increase in frequency     | 1  | 3.60%   | 5  | 9.10%   | 6  | 7.20%   |
|                  | Slight increase in frequency   | 5  | 17.90%  | 7  | 12.70%  | 12 | 14.50%  |
|                  | Not at all / normal            | 9  | 32.10%  | 15 | 27.30%  | 24 | 28.90%  |
|                  | Total                          | 28 | 100.00% | 55 | 100.00% | 83 | 100.00% |
| <b>12 months</b> | More than ever before          | 1  | 4.00%   | 4  | 8.30%   | 5  | 6.80%   |
|                  | Extremely frequently           | 2  | 8.00%   | 1  | 2.10%   | 3  | 4.10%   |
|                  | Very frequently                | 4  | 16.00%  | 3  | 6.30%   | 7  | 9.60%   |
|                  | Moderate increase in frequency | 3  | 12.00%  | 2  | 4.20%   | 5  | 6.80%   |
|                  | Some increase in frequency     | 2  | 8.00%   | 4  | 8.30%   | 6  | 8.20%   |
|                  | Slight increase in frequency   | 4  | 16.00%  | 12 | 25.00%  | 16 | 21.90%  |
|                  | Not at all / normal            | 9  | 36.00%  | 22 | 45.80%  | 31 | 42.50%  |
|                  | Total                          | 25 | 100.00% | 48 | 100.00% | 73 | 100.00% |

N.B. table includes all patients in ITT population

**Table S2: Exploratory endpoints of rectal bleeding. 2 sample tests of proportion of patients with improvement in symptoms between baseline and 12 months**

|                               | <b>Control</b> | <b>HBO</b>    | <b>Absolute difference</b> | <b>P-value</b> |
|-------------------------------|----------------|---------------|----------------------------|----------------|
|                               | <b>n (%)</b>   | <b>n (%)</b>  | <b>% (95% CI)</b>          |                |
| IBDQ rectal bleeding question | 10/15 (66.7%)  | 26/35 (74.3%) | 7.6% (-20.3%, 35.5%)       | 0.58           |
| Rectal LENT SOMA (objective)  | 12/16 (75.0%)  | 14/23 (60.9%) | -14.1% (-43.3%, 15.0%)     | 0.36           |
| Rectal LENT SOMA (management) | 5/5 (100.0%)   | 4/13 (30.8%)  | -69.2% (-94.3%, -44.1%)    | 0.0085         |
| CTCAE rectal bleeding         | 12/17 (70.6%)  | 13/22 (59.1%) | -11.5% (-41.4%, 18.4%)     | 0.46           |
| EORTC QLQ-CR38 question 59    | 8/18 (44.4%)   | 17/29 (58.6%) | 14.2% (-14.9%, 43.3%)      | 0.34           |

N.B. includes all patients included in the ITT population for whom rectal bleeding was present at baseline (according to each of the scales separately)

**Table S3: Recruitment by centre**

| <b>Hyperbaric treatment centre</b>                                                                      | <b>n</b>  |
|---------------------------------------------------------------------------------------------------------|-----------|
| London Diving Chamber, Hospital of St John and St Elizabeth, London                                     | <b>24</b> |
| Hyperbaric Medicine Unit, St Richard's Hospital, Chichester                                             | <b>15</b> |
| Whipps Cross University Hospital, Leytonstone, London                                                   | <b>11</b> |
| South Wales Hyperbaric Medical Centre (DDRC), Cardiff                                                   | <b>7</b>  |
| North of England Medical and Hyperbaric Services, Spire Hull & East Riding Hospital, Kingston-upon-Hull | <b>6</b>  |
| DDRC Healthcare, Plymouth                                                                               | <b>6</b>  |
| The Diver Clinic, Poole                                                                                 | <b>5</b>  |
| Midlands Diving Chamber, Hospital of St Cross, Rugby                                                    | <b>4</b>  |
| East of England Hyperbaric Unit, Lowestoft Road, Great Yarmouth                                         | <b>3</b>  |
| North West Emergency Recompression Unit, Murrayfield Hospital, Wirral                                   | <b>3</b>  |
| <b>Total</b>                                                                                            | <b>84</b> |

**Table S4: Per protocol analysis of the primary endpoint**

| <b>Primary endpoint 1: Bowel function component of the modified IBDQ</b> |                                |                                 |                                          |                           |         |
|--------------------------------------------------------------------------|--------------------------------|---------------------------------|------------------------------------------|---------------------------|---------|
|                                                                          | Median (IQR) score at baseline | Median (IQR) score at 12 months | Median (IQR) change from baseline to 12m | Mann-Whitney test U Score | P-value |
| Control (n=22)                                                           | 51 (44, 59)                    | 51.5 (40, 59)                   | 3.5 (-6, 9)                              | 0.94                      | 0.35    |
| HBO (n=38)                                                               | 48 (42, 51)                    | 52 (36, 62)                     | 4 (-2, 11)                               |                           |         |
| <b>Primary endpoint 2: rectal bleeding score from the modified IBDQ</b>  |                                |                                 |                                          |                           |         |
|                                                                          | Median (IQR) score at baseline | Median (IQR) score at 12 months | Median change (from baseline to 12m)     | Mann-Whitney test U Score | P-value |
| Control (n=11)                                                           | 3 (2, 4)                       | 4 (2, 6)                        | 1 (1, 2)                                 | 1.44                      | 0.15    |
| HBO (n=25)                                                               | 3 (2, 4)                       | 6 (3, 7)                        | 3 (0, 3)                                 |                           |         |

**Table S5: Exploratory analysis of LENT SOMA scales**

| <b>Change in rectal LENT SOMA total score from baseline to 2 weeks</b> |                                |                               |                                              |                           |             |
|------------------------------------------------------------------------|--------------------------------|-------------------------------|----------------------------------------------|---------------------------|-------------|
|                                                                        | Median (IQR) score at baseline | Median (IQR) score at 2 weeks | Median (IQR) change from baseline to 2 weeks | Mann-Whitney test U Score | P-value     |
| Control (n=28)                                                         | <b>9.5 (8, 14.5)</b>           | <b>8.5 (5.5, 14.0)</b>        | <b>-2 (-3, 0)</b>                            | <b>0.35</b>               | <b>0.72</b> |
| HBO (n=50)                                                             | <b>10 (7, 13)</b>              | <b>8 (4, 12)</b>              | <b>-2 (-3, 1)</b>                            |                           |             |

**Table S6: Exploratory analysis of primary endpoint according to treatment with hood, monochamber or mask.**

| <b>Bowel function in patients treated with a hood or monochamber</b> |                                |                                 |                                          |                           |         |
|----------------------------------------------------------------------|--------------------------------|---------------------------------|------------------------------------------|---------------------------|---------|
|                                                                      | Median (IQR) score at baseline | Median (IQR) score at 12 months | Median (IQR) change from baseline to 12m | Mann-Whitney test U Score | P-value |
| Control (n=14)                                                       | 53 (43, 56)                    | 54.5 (33, 59)                   | 4 (1, 9)                                 | -0.31                     | 0.76    |
| HBO (n=29)                                                           | 48 (44, 54)                    | 55 (36, 63)                     | 2 (-7, 11)                               |                           |         |
| <b>Bowel function in patients treated with a mask</b>                |                                |                                 |                                          |                           |         |
|                                                                      | Median (IQR) score at baseline | Median (IQR) score at 12 months | Median change (from baseline to 12m)     | Mann-Whitney test U Score | P-value |
| Control (n=9)                                                        | 51 (47, 59)                    | 50 (47, 55)                     | 1 (-8, 4)                                | 1.59                      | 0.11    |
| HBO (n=17)                                                           | 46 (35, 51)                    | 49 (46, 55)                     | 8 (1, 13)                                |                           |         |

**Figure S1: Maximum CTCAE toxicities at each timepoint**

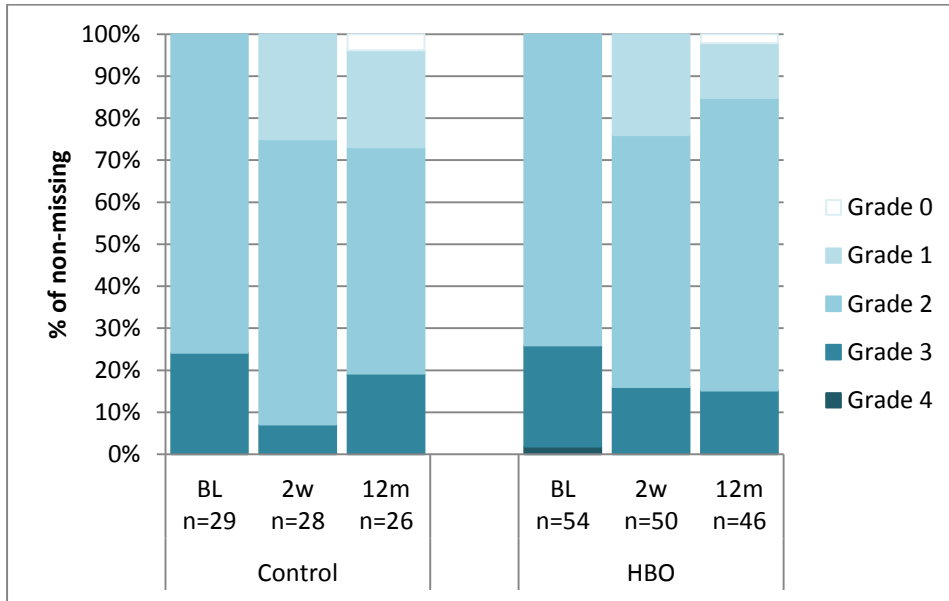

**Figure S2: CTCAE rectal bleeding grade at each timepoint**

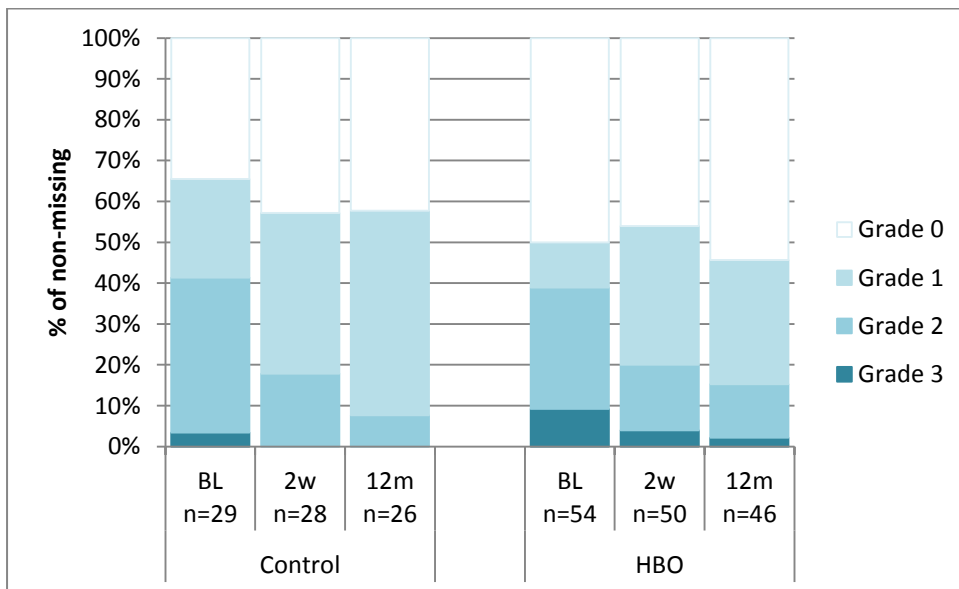

Supplement: mmc1.pdf [file mmc1.pdf]
